# Supplementary material for: Molecular analysis of meso- and thermophilic microbiota associated with anaerobic biowaste degradation
Source: PubMed Central journal article supplement (PMC3408363; doi:10.1186/1471-2180-12-121), 2012-06-22
Supplement: 1471-2180-12-121-S1.pdf [file 1471-2180-12-121-S1.pdf]

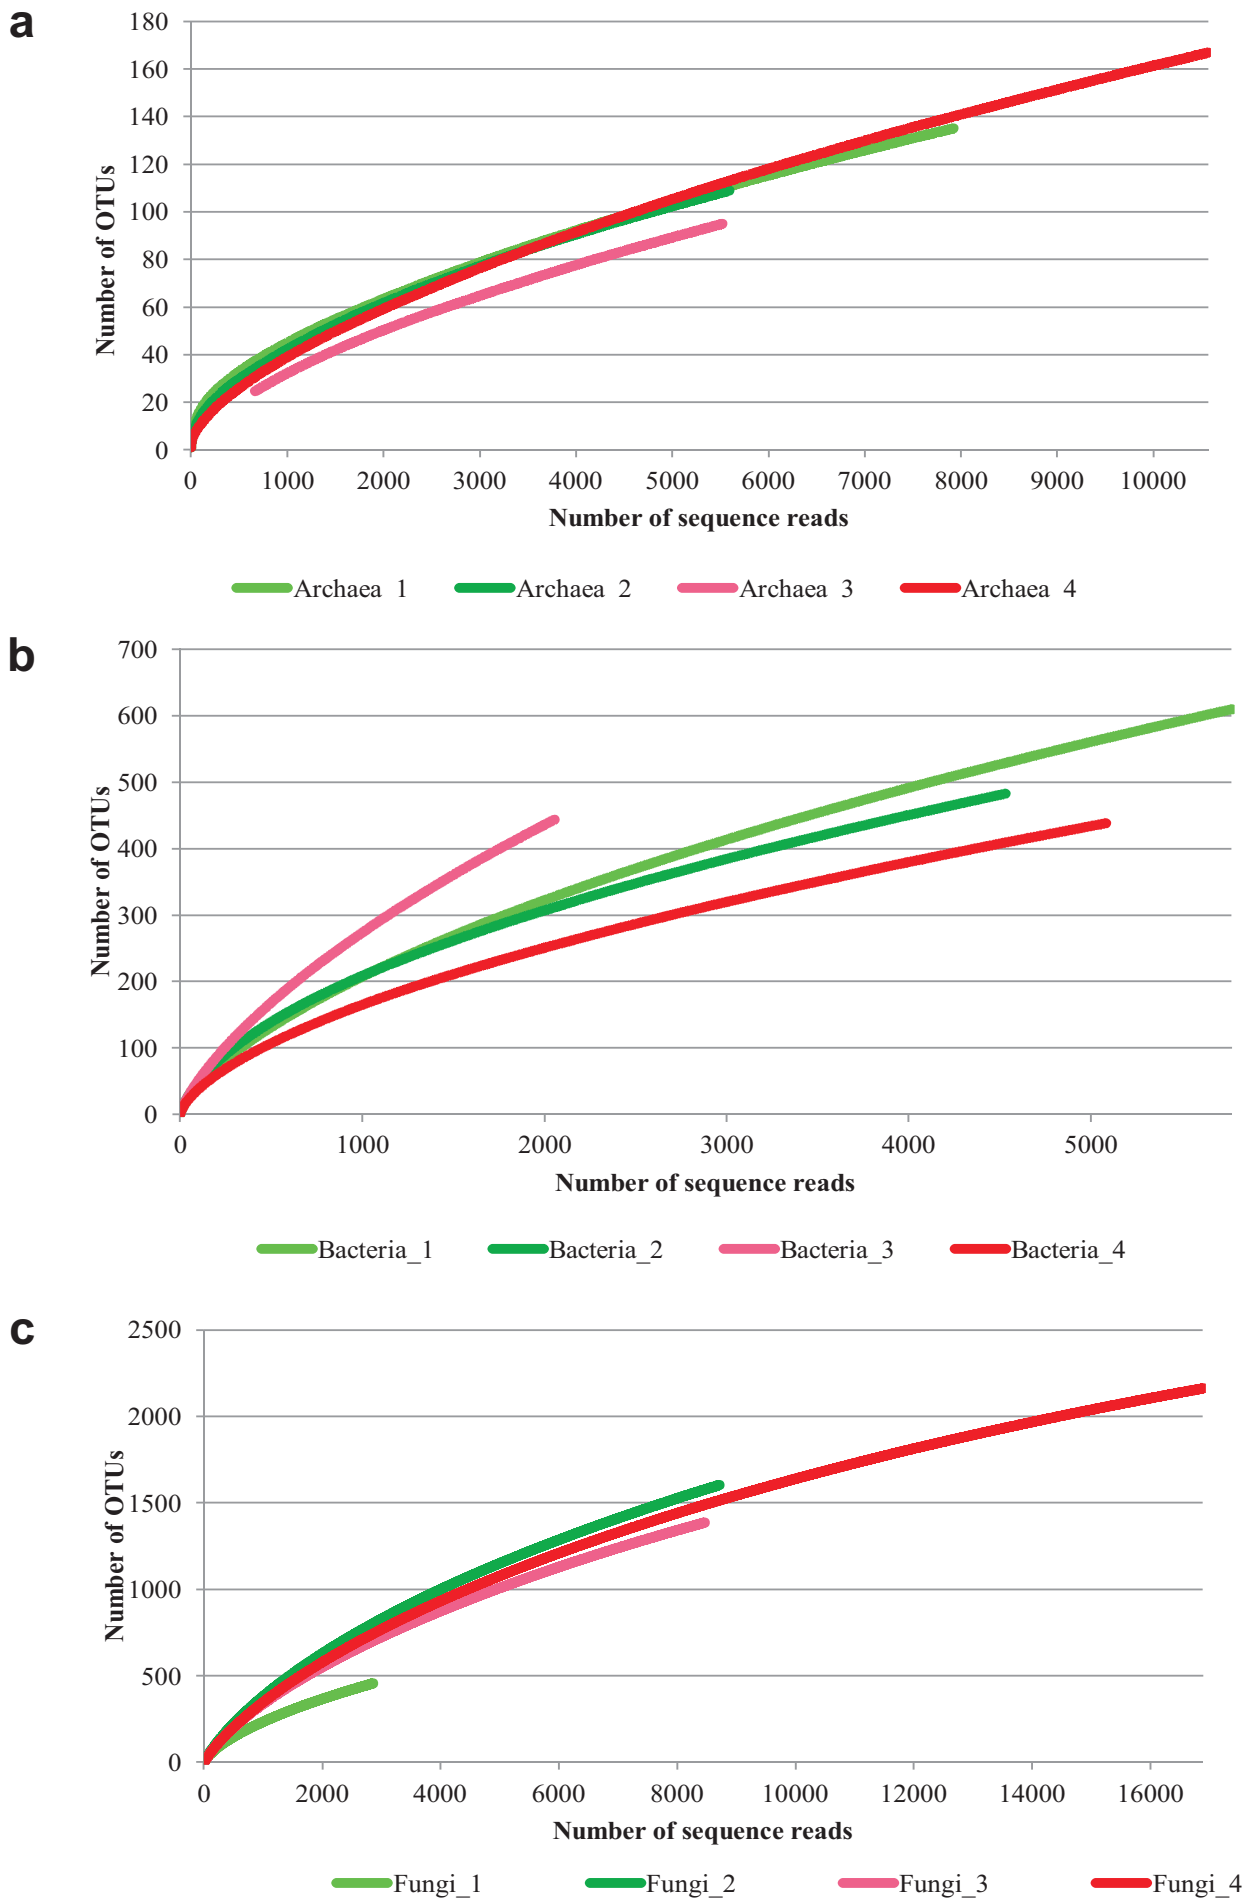

**Additional file 1.** Rarefaction curves representing the relation between the number of sequence reads and the number of operational taxonomic units (97% similarity). a) Archaea, b) Bacteria and c) Fungi.
