# Supplementary material for: Molecular analysis of meso- and thermophilic microbiota associated with anaerobic biowaste degradation
Source: PubMed Central journal article supplement (PMC3408363; doi:10.1186/1471-2180-12-121), 2012-06-22

### pool 1

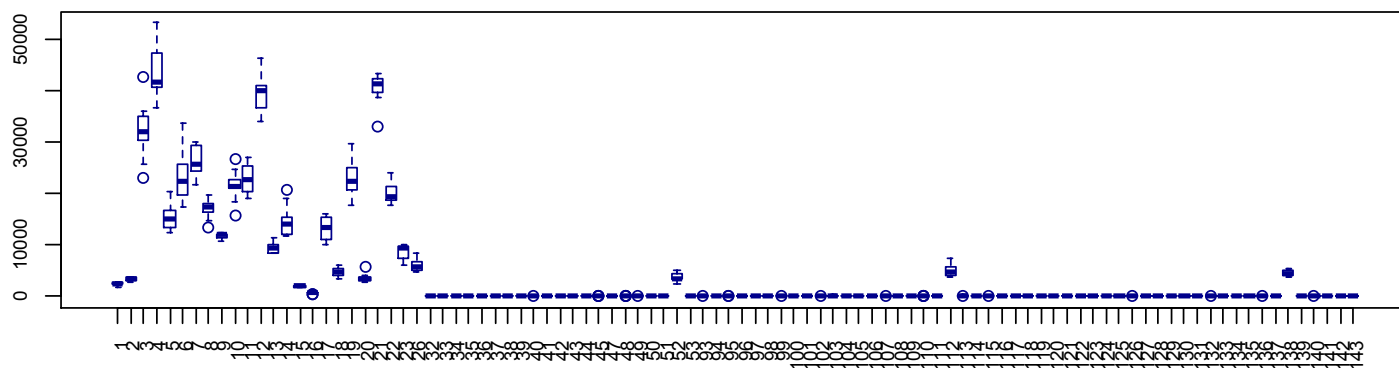

### Pool 1 predicted

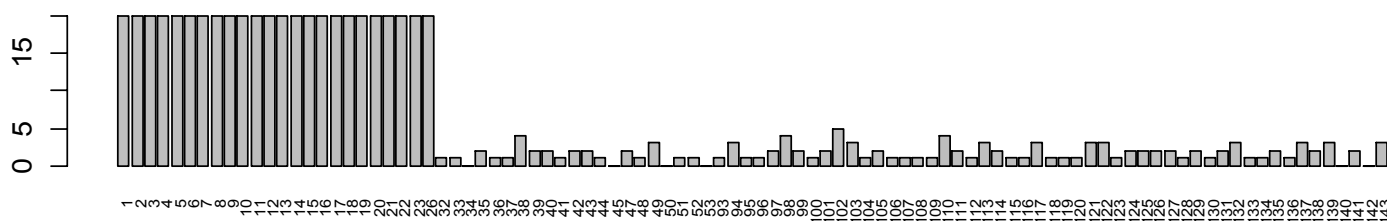

### pool 2

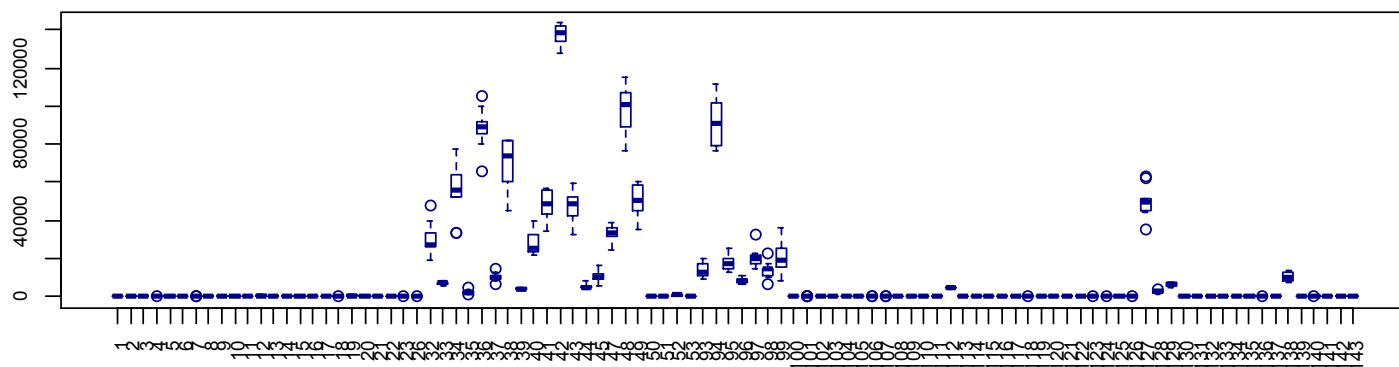

### Pool 2 predicted

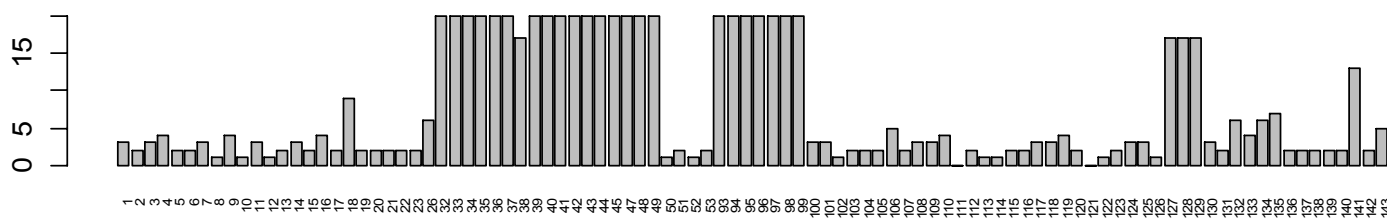

**Additional file 4.** Observed and predicted microarray probe signals from 10 fmol synthetic template pools. (Continues on next page.)

pool 3

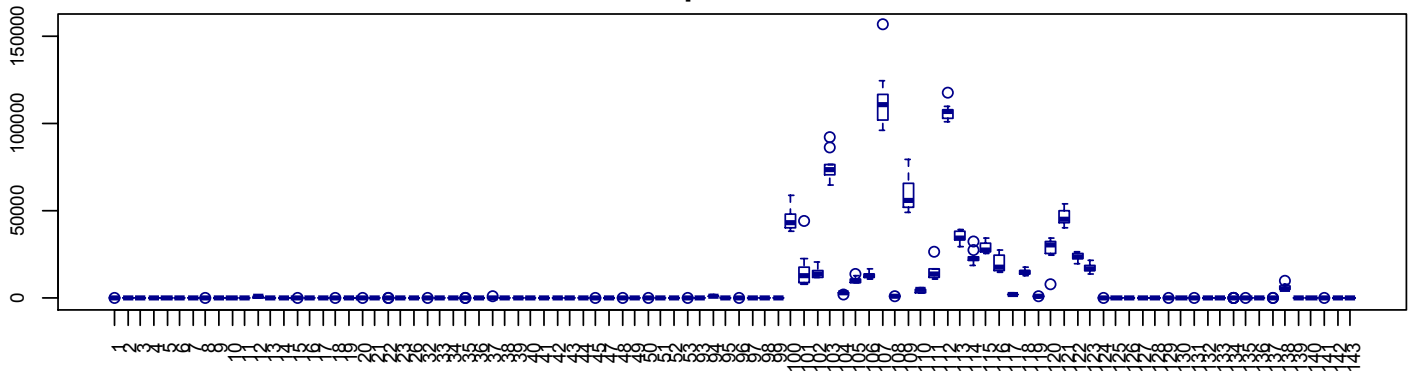

Pool 3 predicted

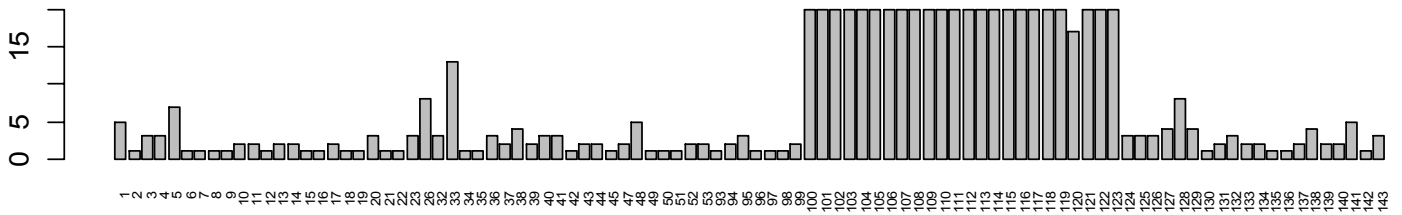

pool 4

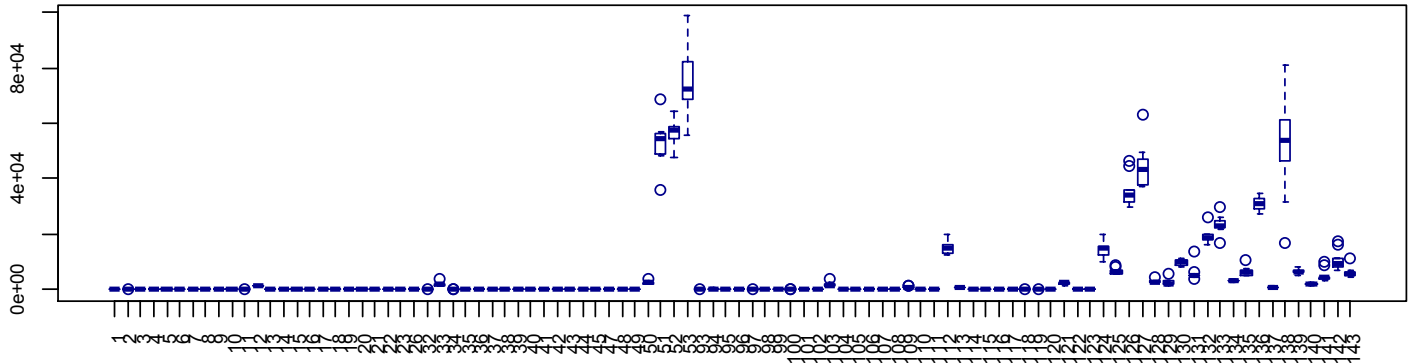

Pool 4 predicted

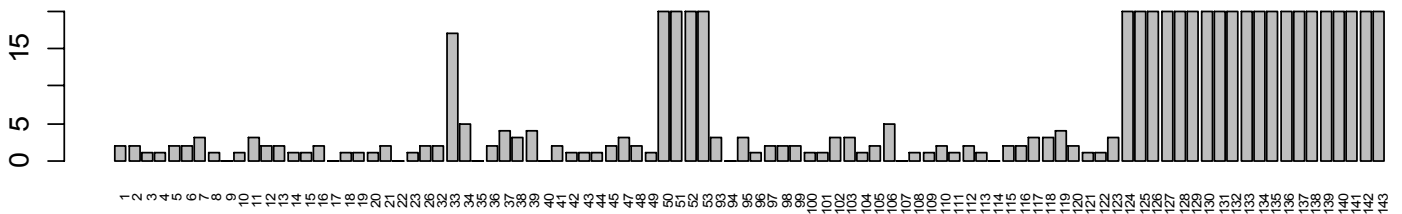

Supplement: 1471-2180-12-121-S4.pdf [file 1471-2180-12-121-S4.pdf]
