# Supplementary material for: Molecular analysis of meso- and thermophilic microbiota associated with anaerobic biowaste degradation
Source: PubMed Central journal article supplement (PMC3408363; doi:10.1186/1471-2180-12-121), 2012-06-22
Supplement: 1471-2180-12-121-S5.pdf [file 1471-2180-12-121-S5.pdf]

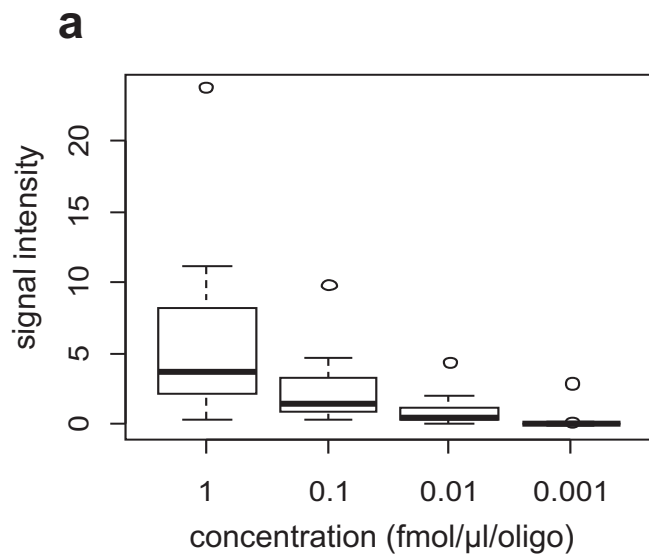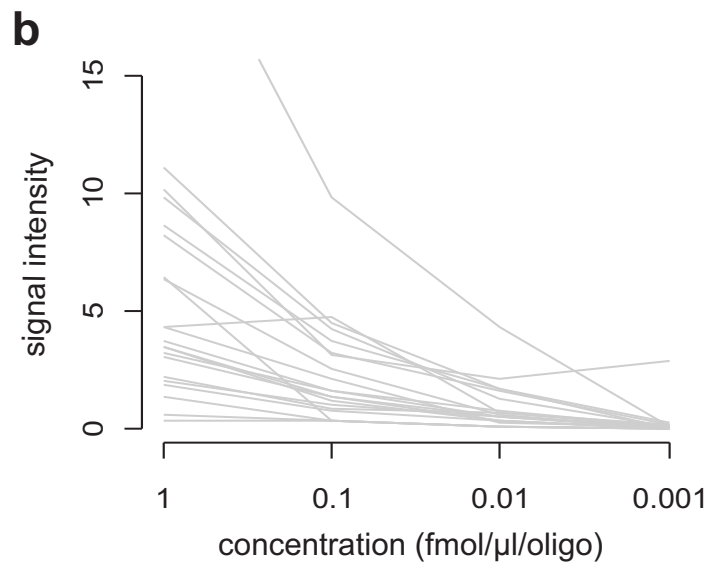

**Additional file 5.** Microarray signals of different concentrations of synthetic template oligos. (a) Boxplots showing the distribution of signals in each concentration and (b) line plots showing mean signals of individual probes.
