# Supplementary material for: Molecular analysis of meso- and thermophilic microbiota associated with anaerobic biowaste degradation
Source: PubMed Central journal article supplement (PMC3408363; doi:10.1186/1471-2180-12-121), 2012-06-22
Supplement: 1471-2180-12-121-S6.pdf [file 1471-2180-12-121-S6.pdf]

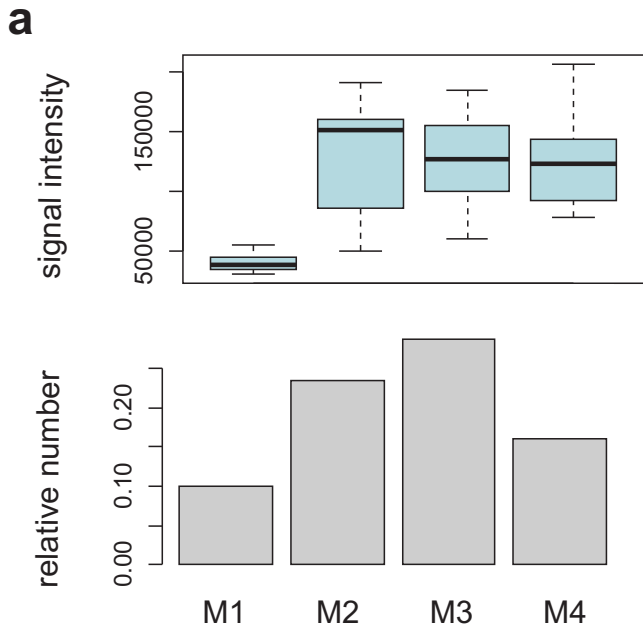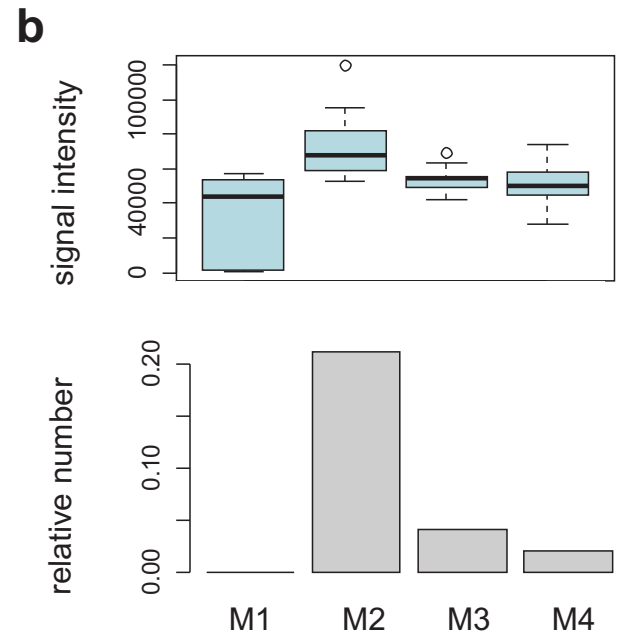

**Additional file 6.** Microarray signals of probes aligning with mismatches to full-length rRNA gene sequences present in the samples M1-4 (upper panels). In lower panels, relative 454 read numbers of corresponding sequences.
